# Supplementary material
Source: PubMed Central journal article supplement (PMC4745128)
Supplement: NIHMS680620-supplement-Supp_Material.pdf [file NIHMS680620-supplement-Supp_Material.pdf]

**Supplement to: Identification of Homogeneous and Heterogeneous Variables in Pooled  
Cohort Studies**

**Xin Cheng<sup>1,\*</sup>, Wenbin Lu<sup>2,\*\*</sup>, and Mengling Liu<sup>1,\*\*\*</sup>**

<sup>1</sup>Departments of Population Health and Environmental Medicine, New York University School of Medicine, New York, U.S.A

<sup>2</sup>Department of Statistics, North Carolina State University, Raleigh, North Carolina, U.S.A.

*\*email:* xc311@nyu.edu

*\*\*email:* lu@stat.ncsu.edu

*\*\*\*email:* mengling.liu@nyu.edu

In this supplement, we provide the proofs of the theorems.

Following the counting process notation, we define the counting process  $N_{ki}(t) = I(T_{ki} \leq t, \delta_{ki} = 1)$ , and the risk process  $Y_{ki}(t) = I(T_{ki} \geq t)$ . For simplicity, we assume that failure time  $T_{ki}^*$  takes values on a finite time interval  $[0, \tau]$ , and we still use  $Z_{ki}$  to denote the predictors corresponding to the transformed parameters  $\theta_n$ . Then the log partial likelihood  $\ell(\theta_n)$  could be expressed as

$$\ell(\theta_n) = \sum_{k=1}^K \sum_{i=1}^{n_k} \int_0^\tau \{\theta'_n Z_{ki} - \log(n_k S_k^{(0)}(\theta_n, t))\} dN_{ki}(t),$$

where  $S_k^{(m)}(\theta_n, t) = n_k^{-1} \sum_{i=1}^{n_k} Y_{ki}(t) Z_{ki}^{\otimes m} \exp(\theta'_n Z_{ki})$ , with  $a^{\otimes m} = 1, a, aa', m = 1, 2, 3$  for a vector  $a$ .

Let  $M_{ki}(t) = N_{ki}(t) - \int_0^t \lambda_{0k}(s) \exp(\theta'_n Z_{ki}) ds$  be the martingale for  $N_{ki}(t)$ . The regularity conditions are given as follows:

(A)  $\int_0^\tau \lambda_{0k}(s) ds < \infty$  for  $k = 1, \dots, K$ .

(B) There exists a neighborhood  $\mathcal{B}$  of the true  $\theta_n^*$  satisfying: (i) There exist a scalar, a vector, and a matrix  $s_k^{(m)}(\theta, t)$  ( $m = 0, 1, 2$ ), such that  $\sup_{t \in [0, \tau], \theta \in \mathcal{B}} \|S_k^{(m)}(\theta_n, t) - s_k^{(m)}(\theta, t)\| \rightarrow 0$  in probability. (ii) functions  $s_k^{(m)}(\theta, t)$  are bounded, and  $s_k^{(0)}(\theta, t)$  is bounded away from zero;  $s_k^{(m)}(\cdot, t)$  are absolutely continuous for  $\theta \in \mathcal{B}$ , uniformly in  $t \in [0, \tau]$ . (iii) let  $e_k(\theta_n, t) = s_k^{(1)}(\theta_n, t)/s_k^{(0)}(\theta_n, t)$ ,  $v_k(\theta_n, t) = s_k^{(2)}(\theta_n, t)/s_k^{(0)}(\theta_n, t) - (e_k(\theta_n, t))^{\otimes 2}$ , and  $I_k(\theta_n^*) = \int_0^\tau v_k(\theta_n^*, s) s_k^{(0)}(\theta_n^*, s) \lambda_{0k}(s) ds$  is positive definite with bounded eigenvalues, for  $k = 1, \dots, K$ .

(C) For  $k = 1, \dots, K$ , there exists a matrix  $\Gamma_k = \Gamma_k(\theta_n^*)$  with bounded eigenvalues such that at true  $\theta_n^*$ ,  $\|n_k^{-1} \sum_{i=1}^{n_k} \text{Var}(D_{ki}) - \Gamma_k\| \rightarrow 0$ , where  $D_{ki} = \int_0^\tau [Z_{ki} - e_k(\theta_n, t)] dM_{ki}(t)$ .

(D) There exists a constant  $C$  such that  $\sup_{k \in [1, K], i \in [1, n_k]} E(D_{kij} D_{kil})^2 < C$ , where  $D_{kij}, D_{kil}$  are the  $j$ -th and  $l$ -th element of  $D_{ki}$ .

Conditions (A)-(D) are also required in Cai et al. (2005), which guarantee the local asymptotic quadratic property for the partial likelihood function and hence the asymptotic normality.

For simplicity, we denote  $\lambda_l^\mu = \lambda_{1n} \omega_{0l}$ ,  $\lambda_k^\alpha = \lambda_{2n} \omega_{1k}$ , and define  $a_n = \max\{\lambda_l^\mu, \lambda_k^\alpha : l \in \mathcal{A}_{1n}, k \in \mathcal{A}_{2n}\}$ , and  $b_n = \min\{\lambda_l^\mu, \lambda_k^\alpha : l \in \mathcal{A}_{1n}^c, k \in \mathcal{A}_{2n}^c\}$ .

*Proof.* [of Theorem 1]

Let  $\eta_n = \sqrt{q_n/n}$ . We show that for any  $\epsilon > 0$ , there exists a large constant  $d$ , such that for any  $\Delta u = (\Delta\mu'_l, \Delta\alpha'_k)'$ ,

$$P\{\inf_{\|\Delta u\|=d} Q_n(\theta_n^* + \eta_n \Delta u) > Q_n(\theta_n^*)\} > 1 - \epsilon. \quad (1)$$

$$\begin{aligned} Q_n(\theta_n^* + \eta_n \Delta u) - Q_n(\theta_n^*) &\geq -\ell(\theta_n^* + \eta_n \Delta u) + \ell(\theta_n^*) + \left\{ \sum_{l \in \mathcal{A}_{1n}} \lambda_l^\mu (|\mu_l^* + \eta_n \Delta \mu_l| - |\mu_l^*|) \right. \\ &\quad \left. + \sum_{k \in \mathcal{A}_{2n}} \lambda_k^\alpha (\|\alpha_k^* + \eta_n \Delta \alpha_k\| - \|\alpha_k^*\|) \right\} \\ &\triangleq H_1 + H_2. \end{aligned}$$

With triangular inequality and Cauchy–Schwarz inequality,

$$\begin{aligned} H_2 &\geq -\sum_{l \in \mathcal{A}_{1n}} \lambda_l^\mu \eta_n |\Delta \mu_l| - \sum_{k \in \mathcal{A}_{2n}} \lambda_k^\alpha \eta_n \|\Delta \alpha_k\| \\ &\geq -\sum_{l \in \mathcal{A}_{1n}} a_n \eta_n |\Delta \mu_l| - \sum_{k \in \mathcal{A}_{2n}} a_n \eta_n \|\Delta \alpha_k\| \\ &\geq -a_n \eta_n \sqrt{q_n} d \geq -m \eta_n^2 d, \end{aligned}$$

the last step is due to the condition  $\lambda_{1n}/\sqrt{n} \rightarrow 0$ ,  $\lambda_{2n}/\sqrt{n} \rightarrow 0$ , which implies  $a_n/\sqrt{n} \rightarrow_p 0$ ,  $a_n \sqrt{q_n} < \sqrt{n} \sqrt{q_n} < \sqrt{q_n/n} = m \eta_n$ .

With Taylor expansion and arguments in Cai et al. (2005),

$$\begin{aligned} H_1 &= -\nabla \ell(\theta_n^*) \eta_n \Delta u - \frac{1}{2} (\eta_n \Delta u)' \nabla^2 \ell(\tilde{\theta}_n) (\eta_n \Delta u) \\ &\triangleq H_{11} + H_{12}, \end{aligned}$$

where  $\tilde{\theta}_n$  lies between  $\theta_n^*$  and  $\theta_n^* + \eta_n \Delta u$ .

$$|H_{11}| \leq \eta_n \|\Delta u\| \times \|\nabla \ell(\theta_n^*)\| = O_p(\eta_n \sqrt{n q_n}) d = O_p(n \eta_n^2 d).$$

Using Chebyshev's inequality and the assumption  $q_n^4/n \rightarrow 0$ ,  $\|\frac{1}{n} \nabla^2 \ell(\tilde{\theta}_n) + I(\theta_n^*)\| = o_p(1)$  (Cai et al., 2005),

$$\begin{aligned} H_{12} &= -\frac{1}{2} n \eta_n^2 [\Delta u' \{ \frac{1}{n} \nabla^2 \ell(\tilde{\theta}_n) + I(\theta_n^*) \} \Delta u] + \frac{1}{2} n \eta_n^2 \Delta u' I(\theta_n^*) \Delta u \\ &= \frac{1}{2} n \eta_n^2 \Delta u' I(\theta_n^*) \Delta u - \frac{1}{2} n \eta_n^2 d^2 o_p(1). \end{aligned}$$

Therefore, combining  $H_{11}$ ,  $H_{12}$  and  $H_2$ , we see  $H_{12}$  dominates the other two. So when  $\|\Delta u\| = d$  is sufficiently large,  $Q_n(\theta_n^* + \eta_n \Delta u) > Q_n(\theta_n^*)$ . This completes the proof.

*Proof.* [of Theorem 2] We show  $P(\hat{\theta}_{\mathcal{A}_n^c=0}) \rightarrow 1$ . Without loss of generality, we assume the true value  $\alpha_k^*$  of  $\theta_n^*$  equals to for a certain  $k$ , and show in details  $P(\hat{\alpha}_k = 0) \rightarrow 1$ . Suppose  $\hat{\alpha}_k \neq 0$ , then  $Q_n$  becomes differentiable w.r.t  $\alpha_k$ . Therefore,

$$0 = -\frac{\partial \ell}{\partial \alpha_k}(\hat{\theta}_n) + \lambda_k^\alpha \frac{\hat{\alpha}_k}{\|\hat{\alpha}_k\|}. \quad (2)$$

$$-\frac{\partial \ell}{\partial \alpha_k}(\hat{\theta}_n) = -\frac{\partial \ell}{\partial \alpha_k}(\theta_n^*) - \sum_{j=1}^{q_n} \frac{\partial^2 \ell(\tilde{\theta}_n)}{\partial \alpha_k \partial \theta_j}(\hat{\theta}_j - \theta_j^*)$$

$$\triangleq H_1 + H_2.$$

We can easily see that  $H_1 = O_p(\sqrt{nq_n})$ , and for  $H_2$ ,

$$H_2 = -\sum_{j=1}^{q_n} \left( \frac{\partial^2 \ell}{\partial \alpha_k \partial \theta_j} - E\left(\frac{\partial^2 \ell}{\partial \alpha_k \partial \theta_j}\right) \right) (\hat{\theta}_j - \theta_j^*) - \sum_{j=1}^{q_n} E\left(\frac{\partial^2 \ell}{\partial \alpha_k \partial \theta_j}\right) (\hat{\theta}_j - \theta_j^*)$$

$$\triangleq H_{21} + H_{22}.$$

By Cauchy-Schwarz inequality,

$$\begin{aligned} |H_{21}| &\leq \left[ \sum_{j=1}^{q_n} \left\{ \frac{\partial^2 \ell}{\partial \alpha_k \partial \theta_j} - E\left(\frac{\partial^2 \ell}{\partial \alpha_k \partial \theta_j}\right) \right\}^2 \right]^{1/2} \|\hat{\theta}_n - \theta_n^*\| \\ &= O_p(\sqrt{q_n n}) O_p(\sqrt{q_n/n}) = o_p(\sqrt{nq_n}), \end{aligned}$$

$$\begin{aligned} |H_{22}| &\leq n O_p(1) \|\hat{\theta}_n - \theta_n^*\| \\ &= n O_p(1) O_p(\sqrt{q_n/n}) = O_p(\sqrt{nq_n}), \end{aligned}$$

we get  $H_2 = O_p(\sqrt{nq_n})$ . The " $\leq$ " in  $H_{22}$  is due to the finite eigenvalues of the information matrix.

Therefore,  $H_1 + H_2 = O_p(\sqrt{nq_n})$ . Since  $\lambda_{1n}/q_n \rightarrow \infty$  and  $\lambda_{2n}/q_n \rightarrow \infty$ ,  $b_n/\sqrt{nq_n} \rightarrow \infty$ ,  $\left\| \lambda_k^\alpha \hat{\alpha}_k / \|\hat{\alpha}_k\| \right\| \geq b_n = \sqrt{nq_n}(b_n/\sqrt{nq_n}) > \sqrt{nq_n} O_p(1)$ . That implies the "=" in (2) cannot be satisfied. Proof is completed.

*Proof.* [of Theorem 3]

We first show  $I_{\mathcal{A}_n}(\hat{\theta}_{\mathcal{A}_n} - \theta_{\mathcal{A}_n}^*) = \frac{1}{n} \nabla_{\mathcal{A}_n} \ell(\theta^*) + o_p(n^{-1/2})$ . Then for any  $m \times s_n$  matrix  $B_n$ , Lindeberg–Feller central limit theorem gives

$$\sqrt{n} B_n I_{\mathcal{A}_n}(\hat{\theta}_{\mathcal{A}_n} - \theta_{\mathcal{A}_n}^*) = \sqrt{n} B_n I_{\mathcal{A}_n}^{-1/2} \left\{ \frac{1}{n} \nabla_{\mathcal{A}_n} \ell(\theta_n^*) \right\} \rightarrow_d N(0, G).$$

Since  $0 = -\nabla_{\mathcal{A}_n} \ell(\hat{\theta}_n) + D(\hat{\theta}_n)$ ,  $D(\hat{\theta}) = (\lambda_l^\mu \text{sgn}(\hat{\mu}_l), \lambda_k^\alpha \hat{\alpha}_k / \|\hat{\alpha}_k\|)_{l \in \mathcal{A}_{1n}, k \in \mathcal{A}_{2n}}$ ,  $\|D(\hat{\theta}_n)\|^2 \leq s_n a_n^2$ , and  $\lambda_{1n}$ ,  $\lambda_{2n}$  satisfy the conditions in Theorem 3, then  $a_n^2 = o_p(n/q_n)$ ,  $D(\hat{\theta}_n) = \sqrt{s_n o_p(n/q_n)} = o_p(\sqrt{n})$ .

By Taylor expansion,

$$\begin{aligned} -\nabla_{\mathcal{A}_n} \ell(\hat{\theta}_n) &= -\nabla_{\mathcal{A}_n} \ell(\theta_n^*) - \nabla_{\mathcal{A}_n}^2 \ell(\tilde{\theta}_n)(\hat{\theta}_{\mathcal{A}_n} - \theta_{\mathcal{A}_n}^*), \\ I_{\mathcal{A}_n}(\hat{\theta}_{\mathcal{A}_n} - \theta_{\mathcal{A}_n}^*) &= -\frac{1}{n} \nabla_{\mathcal{A}_n}^2 \ell(\tilde{\theta}_n)(\hat{\theta}_{\mathcal{A}_n} - \theta_{\mathcal{A}_n}^*) + \left\{ I_{\mathcal{A}_n} + \frac{1}{n} \nabla_{\mathcal{A}_n}^2 \ell(\tilde{\theta}_n) \right\} (\hat{\theta}_{\mathcal{A}_n} - \theta_{\mathcal{A}_n}^*) \\ &\triangleq H_1 + H_2. \end{aligned}$$

By Cauchy–Schwarz inequality, we can easily see that  $H_2 = o_p(1/\sqrt{n})$ . Therefore,  $I_{\mathcal{A}_n}(\hat{\theta}_{\mathcal{A}_n} - \theta_{\mathcal{A}_n}^*) = \frac{1}{n} \nabla_{\mathcal{A}_n} \ell(\theta^*) + o_p(n^{-1/2})$ .

Now we justify the conditions for Lindeberg–Feller central limit theorem. Let  $G_{ki} = \frac{1}{\sqrt{n}} B_n I_{\mathcal{A}_n}^{-1/2} D_{ki}$ , where  $D_{ki}$  corresponds to the nonzero elements in  $D_{ki}$ . Since

$$\begin{aligned} \sum_{i=1}^{n_k} E \left[ \|G_{ki}\|^2 I\{\|G_{ki}\| \geq \epsilon\} \right] &\leq \left[ \sum_{i=1}^{n_k} E \|G_{ki}\|^4 \right]^{1/2} \left[ \sum_{i=1}^{n_k} E(I\{\|G_{ki}\| \geq \epsilon\}) \right]^{1/2} \\ &\leq \sqrt{\frac{1}{n^2} E \left\| \sum_{i=1}^{n_k} B_n I_{\mathcal{A}_n}^{-1/2} D_{ki} \right\|^4} \sqrt{\frac{\sum_{i=1}^{n_k} E \|G_{ki}\|^2}{\epsilon^2}} \\ &\leq \sqrt{\frac{1}{n^2} \lambda_{\max}^2(B'_n B_n) \lambda_{\min}^2(B'_n B_n) O_p(s_n^2)} \times O_p(1) \\ &= o_p(1), \end{aligned}$$

then  $\sum_{k=1}^K \sum_{i=1}^{n_k} E \left[ \|G_{ki}\|^2 I\{\|G_{ki}\| \geq \epsilon\} \right] = o_p(1)$ . By central limit theorem, we prove the asymptotic normality.

## References

Cai, J., Fan, J., Li, R., and Zhou, H. (2005). Variable selection for multivariate failure time data. *Biometrika* **92**, 303–316.
